# Supplementary material for: Simultaneous Disulfide and Boronic Acid Ester Exchange in Dynamic Combinatorial Libraries
Source: MDPI journal article supplement (doi:10.3390/ijms160921858), 2015-09-10
Supplement: s1 [file s1]

# Supplementary Information

## 1. NMR Experiments for Disulfide Exchange and Boronic Ester Transesterification in $\text{CDCl}_3$

All building block samples were 10 mM in  $\text{CDCl}_3$  and base concentration 100 mM in  $\text{CDCl}_3$ . All Boronic ester experiments were equilibrated for 30 min before equilibrium was reached and all disulfide samples were equilibrated for 20 h.

### 1.1. Disulfide Exchange (Figure 5 in Manuscript)

The reversibility was investigated by starting the reaction in two different ways.

Method (a): The NMR sample was prepared by mixing the two thiols immediately 1:1 with 5 equivalent. base. The NMR sample was left for 24 min before the sample was analyzed.

Method (b): The two NMR samples containing either thiol was prepared by mixing the individual thiol with 5 equivalent base. The NMR sample was left for 24 h before the sample was analyzed. Then, the two samples were combined and analyzed again after 24 h to confirm that equilibrium had been reached.

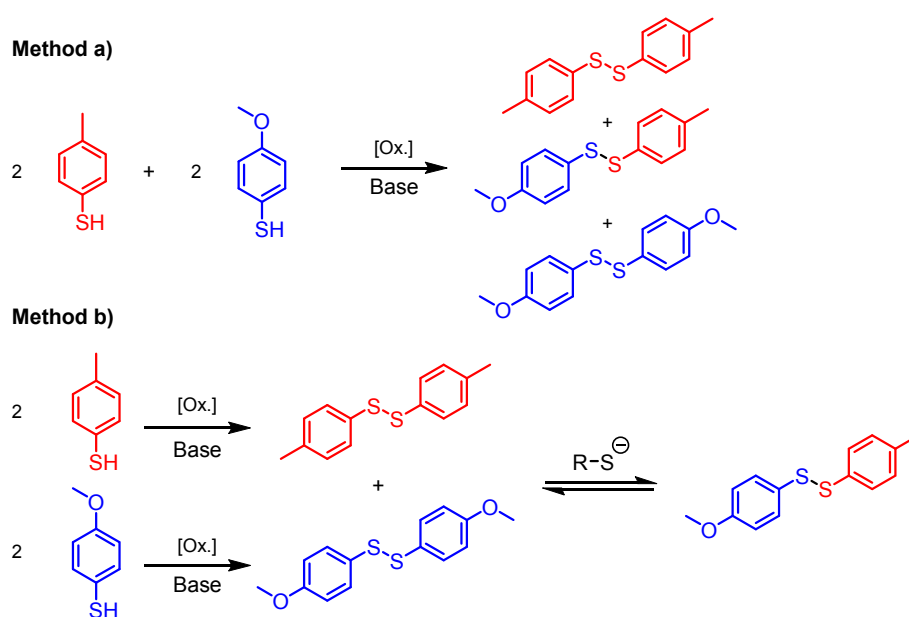

**Figure S1.** Schematic representation of the experiments used to establish the thermodynamic equilibrium.

### 1.2. Establishing Equilibrium for Boronic Ester Transesterification (Figure 6 in Manuscript)

The reversibility was investigated by starting the reaction in two different ways.

Method (i): The NMR sample contained 2 equivalent phenylboronic acid (**1**), 1 equivalent catechol (**2**), 1 equivalent methyl 3,4-dihydroxybenzoate (**3**) and 5 equivalent base. The NMR sample was left for 30 minutes before the sample was analyzed.

Method (ii): The NMR sample contained 2 equivalent phenylboronic acid (**1**), 1 equivalent catechol (**2**) and 5 equivalent base. The NMR sample stood for 30 min. Then, 1 equivalent methyl

3,4-dihydroxybenzoate (**3**) was added and the sample was left for 30 min before analysis. In method (ii), the reverse order of addition was also investigated.

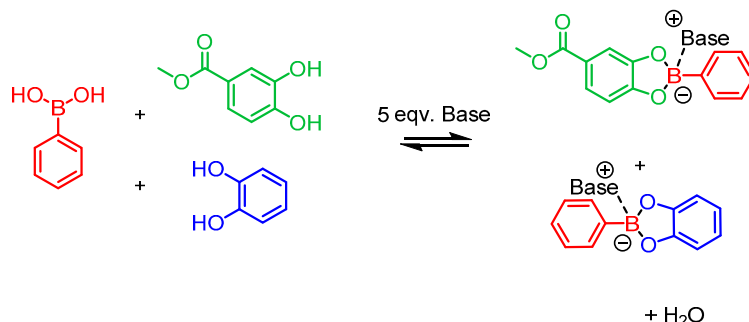

**Figure S2.** Schematic representation of the experiments used to establish the thermodynamic equilibrium.

## 2. Fitting of Binding Constants (Figure 4 in Manuscript)

From the Job plots, a 1:1 stoichiometry between host and guest was found. Hence, the equilibrium constant for the host-guest complexation is given by Equation (1). In this expression, the denominator is expanded by substitution with  $[H] = [H]_0 - [HG]$  and  $[G] = [G]_0 - [HG]$ , giving Equation (2).

$$K = \frac{[HG]}{[H][G]} \quad (1)$$

$$K = \frac{[HG]}{([H]_0 - [HG])([G]_0 - [HG])} = \frac{[HG]}{[H]_0[G]_0 - [HG]([H]_0 + [G]_0) + [HG]^2} \quad (2)$$

Equation (2) can be rearranged to the second order equation (Equation (3)) with  $[HG]$  as the unknown, and the general solution is given in Equation (4).

$$0 = [HG]^2 - [HG] \left( [G]_0 + [H]_0 + \frac{1}{K} \right) + [H]_0[G]_0 \quad (3)$$

$$[HG] = \frac{1}{2} \left( \left( [G]_0 + [H]_0 + \frac{1}{K} \right) \pm \sqrt{\left( [G]_0 + [H]_0 + \frac{1}{K} \right)^2 - 4[G]_0[H]_0} \right) \quad (4)$$

Only the solution where the last term is subtracted is chemically meaningful because the solution with a plus sign results in a concentration of complex that is higher than the smallest of the numbers  $[G]_0$  and  $[H]_0$ .

Equation (4) gives an expression where the unknowns are  $[HG]$  and  $K$ . The purpose is to find  $K$  and  $^1\text{H-NMR}$  was used to provide a measure of  $[HG]$ . Various amounts of  $\text{Et}_3\text{N}$  were titrated into a solution of the boronic ester **7** under conditions where the total concentration of host was constant and the movement of a host signal (denoted  $\delta$ ) was followed.

Under the used conditions, the complexation was fast on the chemical shift time scale, and therefore the observed signal  $\delta$  is as a weighted average of the signals  $\delta_H$  (chemical shift of the proton in pure host) and  $\delta_{HG}$  (chemical shift of the proton in pure complex) with the mole fractions  $X_H$  and  $X_{HG}$  as the

weighting factors. This is expressed in Equation (5), which, via standard manipulations, can be written as Equation (6).

$$\begin{aligned}\delta &= \delta_H X_H + \delta_{HG} X_{HG} \\ &= \delta_H \frac{[H]_0 - [HG]}{[H]_0} + \delta_{HG} \frac{[HG]}{[H]_0}\end{aligned}\quad (5)$$

$$= \delta_H + (\delta_{HG} - \delta_H) \frac{[HG]}{[H]_0} \quad (6)$$

For each measurement in the titration, the change from  $\delta_H$  to the observed  $\delta$  was calculated and denoted  $\Delta\delta = \delta - \delta_H$ . The unknown quantity,  $\delta_{HG} - \delta_H$ , indicates the maximal obtainable change in the titration and is denoted  $\Delta\delta_{\max}$ . With these notations, Equation (6) can be rewritten as Equation (7) and by substitution of Equation (4) into Equation (7), the final fitting equation, Equation (8), is obtained.

$$\Delta\delta = \Delta\delta_{\max} \frac{[HG]}{[H]_0} \quad (7)$$

$$= \frac{\Delta\delta_{\max}}{2[H]_0} \left( \left( [G]_0 + [H]_0 + \frac{1}{K} \right) - \sqrt{\left( [G]_0 + [H]_0 + \frac{1}{K} \right)^2 - 4[G]_0[H]_0} \right) \quad (8)$$

In Equation (8), the quantities  $\Delta\delta_{\max}$  and  $K$  are unknown but linked to the measurable quantity  $\Delta\delta$  and the known  $[H]_0$  and  $[G]_0$ . Using the software, SciDavis,  $\Delta\delta_{\max}$  and  $K$  were determined by fitting the equation data to Equation (8).

The chemical shift changes for H2, H3 and H4 were each monitored and used to determine  $\Delta\delta_{\max}$  and  $K$  and the average taken.

**Table S1.** Binding constants determined.

|    |                       |                  |
|----|-----------------------|------------------|
| H2 | $K$                   | $590 \pm 50$     |
|    | $\Delta\delta_{\max}$ | $0.67 \pm 0.007$ |
| H3 | $K$                   | $690 \pm 70$     |
|    | $\Delta\delta_{\max}$ | $0.46 \pm 0.005$ |
| H4 | $K$                   | $850 \pm 130$    |
|    | $\Delta\delta_{\max}$ | $0.25 \pm 0.004$ |
